# Supplementary material for: Longitudinal Study of Cognitive Functioning in Adults with Juvenile Idiopathic Arthritis
Source: MDPI journal article supplement (doi:10.3390/biomedicines10071729), 2022-07-18
Supplement: s1 [file s1]

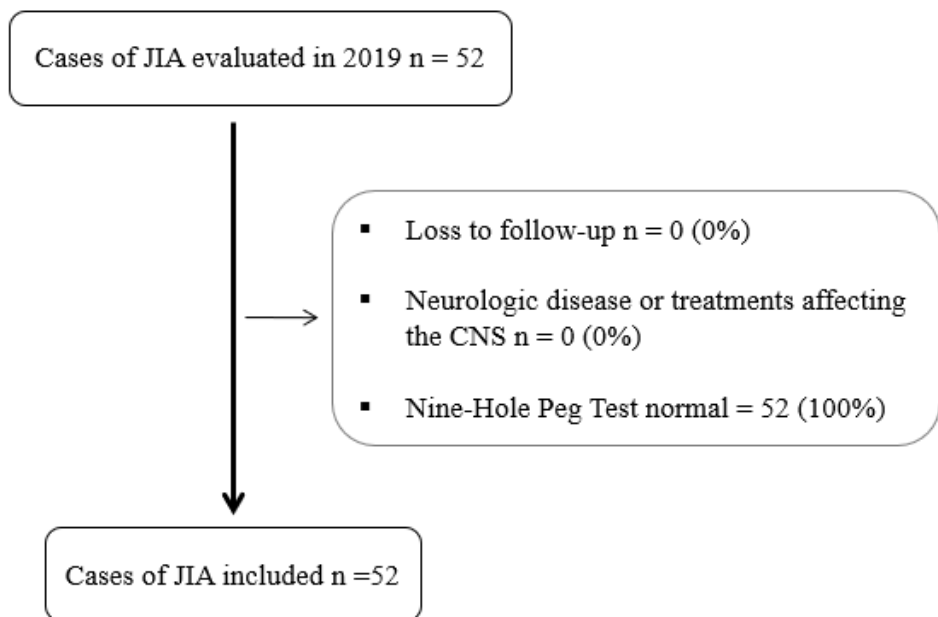

Figure S1. Patient flowchart.

A)

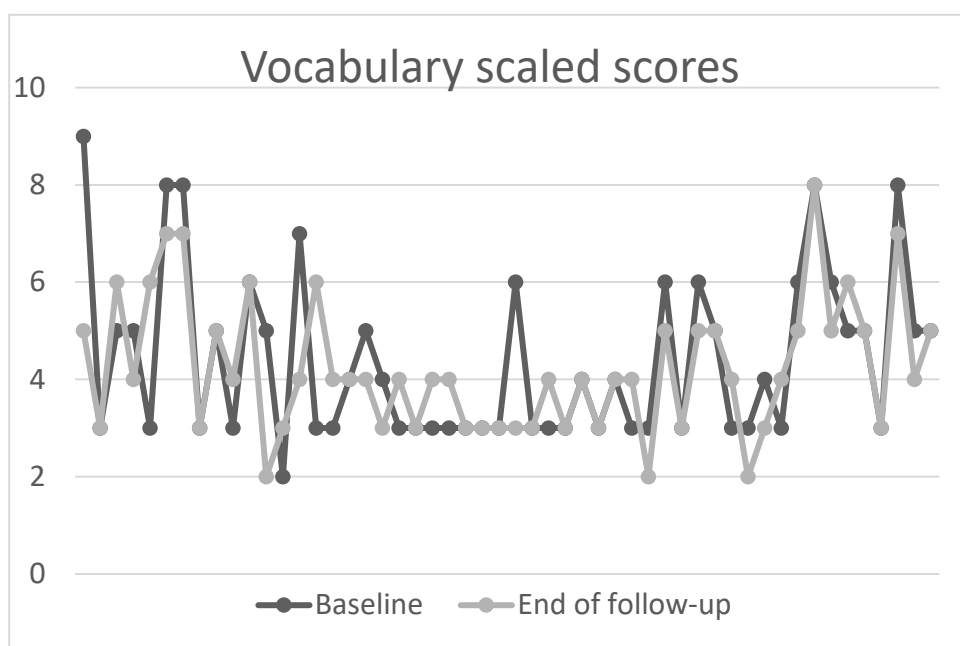

B)

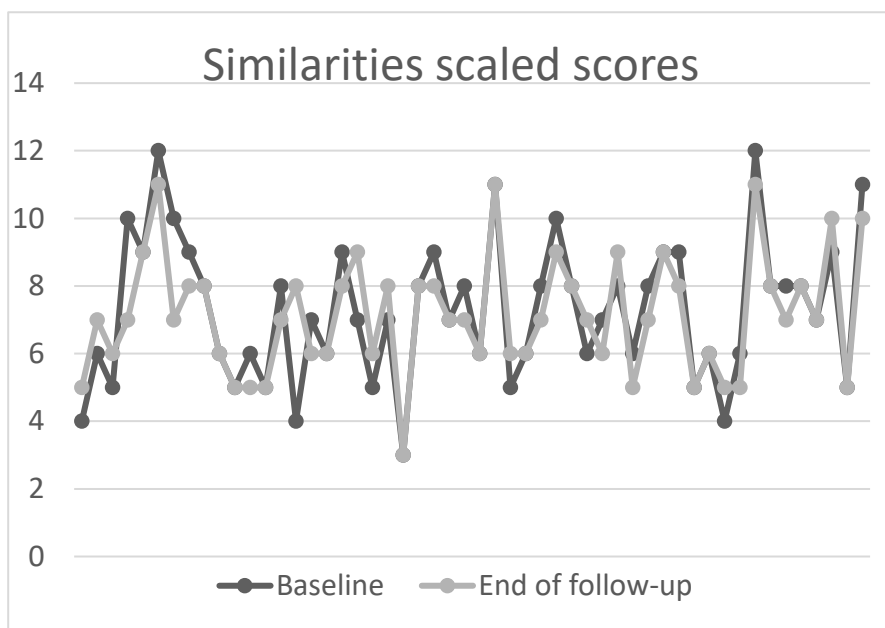

C)

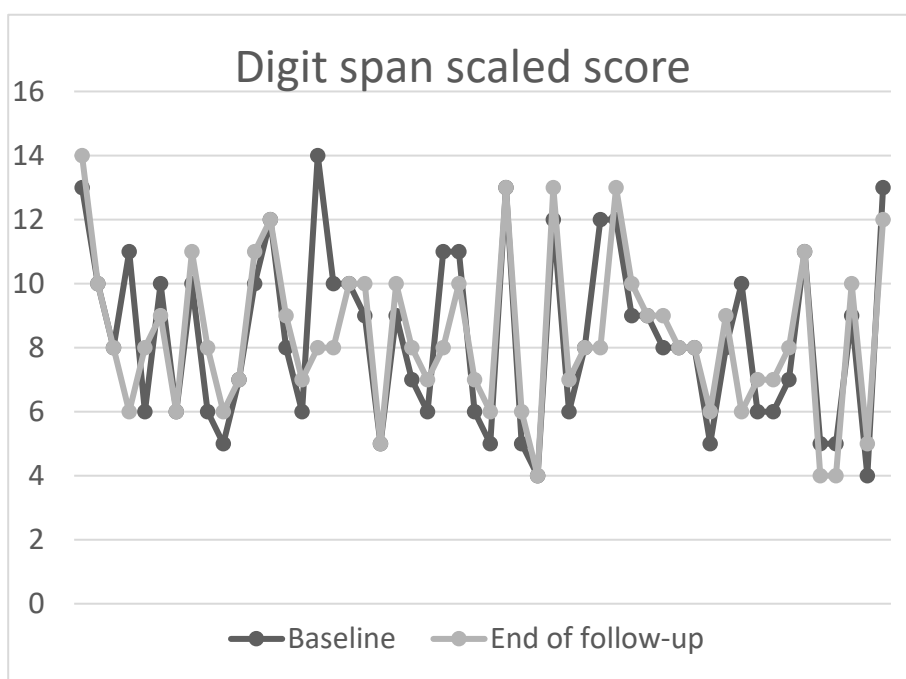

D)

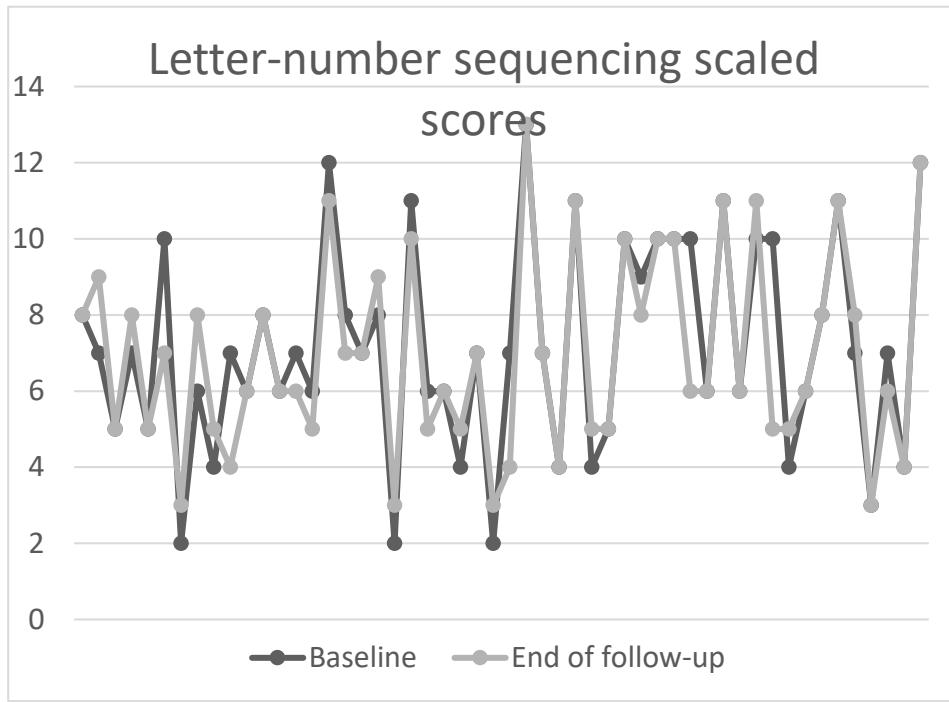

**E)**

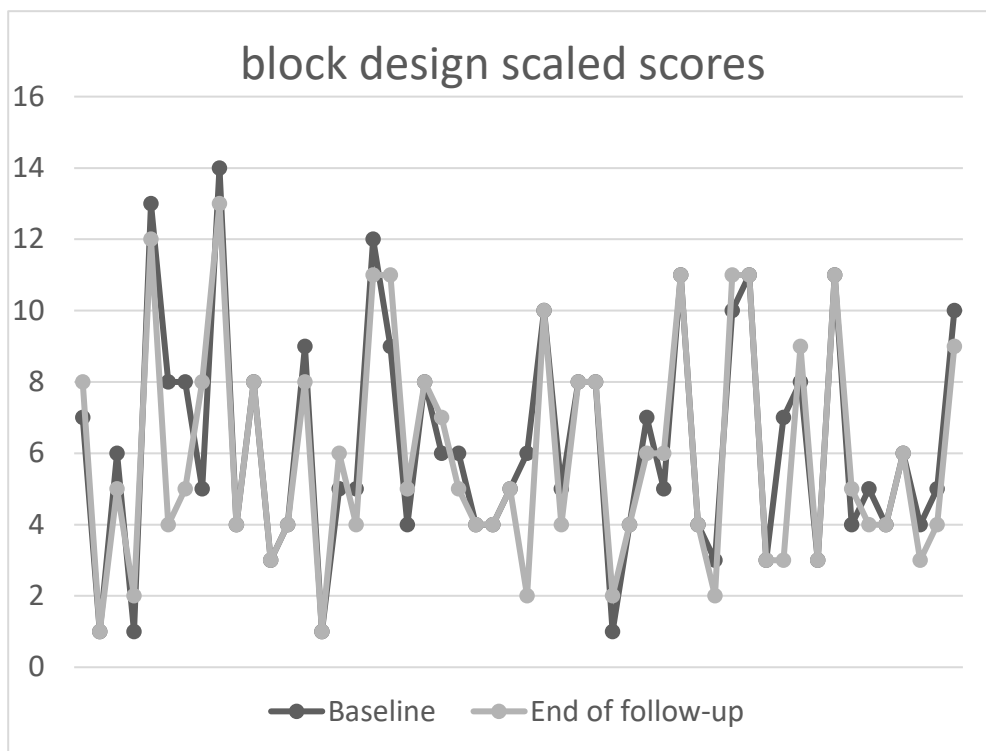

**Figure S2.** Scaled Scores.(A): Vocabulary scaled scores for each patient; (B): Similarities scaled scores for each patient; (C): Digit span scaled score for each patient; (D): Letter-number sequencing scaled scores for each patient; (E): block design scaled scores for each patient.

**Table S1.** Characteristics of patients with JIA and cognitive decline.

| Patient    | Age at<br>V24<br>(years) | Treatment at<br>V24        | Average<br>CRP<br>(mg/dl) | Depression<br>by BDI<br>(number) | Tests<br>affected                                               |
|------------|--------------------------|----------------------------|---------------------------|----------------------------------|-----------------------------------------------------------------|
| Patient 1  | 29.7                     | Sulfasalazine              | 14.3                      | 8.0                              | Vocabulary                                                      |
| Patient 2  | 28.4                     | No DMARDs                  | 3.23                      | 15.0                             | Letter-<br>number<br>sequencing,<br>block design                |
| Patient 3  | 22.0                     | Etanercept                 | 1.82                      | 8.0                              | Digit span                                                      |
| Patient 4  | 19.6                     | Methotrexate               | 3.20                      | 12.0                             | Similarities,<br>digit span                                     |
| Patient 5  | 24.0                     | No DMARDs                  | 14.1                      | 13.0                             | Digit span                                                      |
| Patient 6  | 21.5                     | Methotrexate               | 6.28                      | 5.0                              | Digit span                                                      |
| Patient 7  | 40.1                     | Adalimumab                 | 12.9                      | 15.0                             | Similarities,<br>block design                                   |
| Patient 8  | 25.8                     | Etanercept                 | 4.0                       | 12.0                             | Digit span,<br>letter-<br>number<br>sequencing                  |
| Patient 9  | 18.6                     | Leflunomide +<br>golimumab | 15.0                      | 14.0                             | Vocabulary,<br>block design,<br>letter-<br>number<br>sequencing |
| Patient 10 | 17.4                     | Etanercept                 | 3.7                       | 9.0                              | Block design                                                    |
| Patient 11 | 18.2                     | No DMARDs                  | 22.2                      | 4.0                              | Digits                                                          |
| Patient 12 | 20.2                     | No DMARDs                  | 9.6                       | 4.0                              | Vocabulary                                                      |
| Patient 13 | 17.9                     | Methotrexate               | 2.9                       | 0                                | Letter-<br>number<br>sequencing                                 |
| Patient 14 | 21.9                     | No DMARDs                  | 3.45                      | 2.0                              | Vocabulary                                                      |
| Patient 15 | 27.5                     | No DMARDs                  | 2.28                      | 6.0                              | Letter-<br>number<br>sequencing                                 |

Abbreviations; CRP: C-reactive protein; DMARD: disease-modifying antirheumatic drug.

**Table S2.** Univariate and multivariate logistic regression of the characteristics of JIA associated with cognitive decline excluding 7 patients with treatment change.

| Variable   | Univariate HR (95% CI) | Multivariate HR (95% CI) | p value |
|------------|------------------------|--------------------------|---------|
| Age, years | 0.808 (0.921-1.112)    |                          |         |
| Female sex | 0.960 (0.268-3.436)    |                          |         |

|                                      |                     |                     |       |
|--------------------------------------|---------------------|---------------------|-------|
| Educational level*                   | 0.157 (0.025-0.977) |                     |       |
| Body mass index (kg/m <sup>2</sup> ) | 1.152 (1.004-1.323) |                     |       |
| Average C-reactive protein (mg/dl)   | 1.392 (1.089-1.779) | 1.261 (1.006-1.625) | 0.041 |
| Treatment with biologics             | 0.212 (0.059-0.764) | 0.180 (0.033-0.971) | 0.045 |
| Depression by BDI $\geq$ 14          | 3.338 (1.357-8.213) | 2.852 (1.079-1.536) | 0.035 |

\*Educational level: higher or university vs. basic. Nagelkerke R<sup>2</sup> = 0.481. The variables included in the equation were age, sex, educational level, body mass index, C-reactive protein, treatment with biologics, depression by BDI  $\geq$  14.
